# Supplementary material for: New CZE-DAD method for honeybee venom analysis and standardization of the product
Source: PubMed Central journal article supplement — Anal Bioanal Chem. 2011 Jan 8;399(7):2487–94. doi: 10.1007/s00216-010-4627-2 (PMC3035776; doi:10.1007/s00216-010-4627-2), 2011-01-08
Supplement: 216_2010_4627_MOESM1_ESM.pdf [file 216_2010_4627_MOESM1_ESM.pdf]

**Analytical and Bioanalytical Chemistry**

**Electronic Supplementary Material**

**New CZE-DAD method for honeybee venom analysis  
and standardization of the product**

Zenon J. Kokot, Jan Matysiak, Bartosz Urbaniak, Paweł Dereziński

**Table S1.** The variation coefficients (CV) of related peak areas (A) and migration times ( $t_M$ ) for different concentrations of apamine, MCDP, phospholipase A<sub>2</sub> and melittin (analysis repeatability and injection repeatability).

| Standard                     | Conc. [ $\mu\text{g/g}$ ] | Analysis repeatability |       | Injection repeatability |       |
|------------------------------|---------------------------|------------------------|-------|-------------------------|-------|
|                              |                           | CV [%]                 |       | CV [%]                  |       |
|                              |                           | A                      | $t_M$ | A                       | $t_M$ |
| MCDP                         | 4.9                       | 9.21                   | 0.64  | -                       | -     |
|                              | 9.6                       | 7.22                   | 1.17  | 4.57                    | 5.14  |
|                              | 14.4                      | 2.20                   | 1.02  | 5.69                    | 6.85  |
|                              | 19.2                      | 3.30                   | 0.36  | 2.10                    | 8.46  |
|                              | 23.2                      | 1.30                   | 1.14  | 8.44                    | 8.03  |
|                              | 32.0                      | 3.46                   | 1.22  | 1.87                    | 1.14  |
| Apamine                      | 1.8                       | 3.59                   | 2.07  | 9.45                    | 0.71  |
|                              | 3.6                       | 8.44                   | 0.34  | 10.29                   | 0.12  |
|                              | 6.1                       | 3.98                   | 1.13  | 2.28                    | 0.34  |
|                              | 9.0                       | 6.29                   | 0.53  | 2.09                    | 0.33  |
|                              | 11.9                      | 5.89                   | 0.31  | 2.83                    | 0.61  |
|                              | 14.8                      | 1.66                   | 0.61  | 1.05                    | 0.44  |
|                              | 20.1                      | 8.18                   | 1.32  | 2.30                    | 1.21  |
| Phospholipase A <sub>2</sub> | 9.9                       | 12.82                  | 2.74  | 8.17                    | 1.33  |
|                              | 21.1                      | 10.87                  | 2.67  | 6.32                    | 1.92  |
|                              | 42.1                      | 5.47                   | 0.94  | 10.11                   | 1.81  |
|                              | 62.0                      | 3.46                   | 5.16  | 11.65                   | 7.33  |
|                              | 84.4                      | 5.75                   | 1.63  | 5.95                    | 5.85  |
|                              | 103.2                     | 1.44                   | 0.48  | 1.50                    | 6.49  |
| Melittin                     | 27.6                      | 3.87                   | 6.82  | 2.03                    | 0.76  |
|                              | 49.1                      | 3.14                   | 0.15  | 2.82                    | 1.11  |
|                              | 104.1                     | 4.15                   | 0.31  | 2.58                    | 0.46  |
|                              | 154.4                     | 3.02                   | 0.38  | 3.45                    | 0.44  |
|                              | 202.0                     | 4.94                   | 0.61  | 2.14                    | 0.29  |
|                              | 256.6                     | 3.41                   | 0.23  | 2.11                    | 0.67  |
|                              | 306.3                     | 3.75                   | 5.31  | 2.96                    | 2.23  |

**Table S2.** Recoveries [%] of analytical standards.

| Standard                     | Method I* | Method II** | Method III*** |
|------------------------------|-----------|-------------|---------------|
| MCDP                         | 79.17     | 87.31       | 92.16         |
|                              | 72.53     | 89.43       |               |
|                              | 78.37     | 81.64       |               |
| Apamine                      | 91.12     | 97.35       | 147.58        |
|                              | 84.65     | 92.43       |               |
|                              | 87.48     | 87.20       |               |
| Phospholipase A <sub>2</sub> | 111.62    | 104.96      | 118.06        |
|                              | 109.48    | 105.19      |               |
|                              | 112.31    | 111.94      |               |
| Melittin                     | 101.16    | 100.09      | 108.27        |
|                              | 92.38     | 98.70       |               |
|                              | 106.34    | 108.18      |               |

\* Method I – Bee venom solutions (301.6 µg/g) were mixed with analytical standards in 1:1 ratio. The total contents of standards were approximately 80%, 100% and 120% in relation to dry mass of bee venom.

\* Method II – Bee venom solutions (602.1 µg/g) were mixed with analytical standards in 1:1 ratio. The total contents of standards were approximately 125%, 150% and 175% in relation to dry mass of bee venom.

\*\*\*Method III– The mixture with the known concentrations of the analyzed standards was prepared, and then recovery of them was established. The total contents of standards in mixture obtained were similar to those from natural honeybee venom.

**Table S3.** The calibration data of the HPCE and HPLC for MCDP, apamine, phospholipase A<sub>2</sub> and melittin.

| Standard                     | HPCE   |        |          | HPLC   |        |          |
|------------------------------|--------|--------|----------|--------|--------|----------|
|                              | R      | a      | b        | R      | a      | b        |
| MCDP                         | 0,9985 | 0,0137 | - 0,0143 | 0,9986 | 0,0305 | - 0,0539 |
| Apamine                      | 0,9976 | 0,0331 | - 0,0229 | 0,9996 | 0,0466 | - 0,0115 |
| Phospholipase A <sub>2</sub> | 0,9968 | 0,0443 | - 0,3179 | 0,9996 | 0,0418 | 0,1795   |
| Melittin                     | 0,9999 | 0,0376 | - 0,1475 | 0,9999 | 0,0551 | - 0,3473 |

**Table S4.** Factor loadings for all analyzed constituents (apamine, MCDP, phospholipase A<sub>2</sub>, melittin) of bee venom (samples number 1 to 19).

|                              | PC1    | PC2    | PC3    | PC4    |
|------------------------------|--------|--------|--------|--------|
| Apamine                      | -0.972 | 0.071  | 0.084  | 0.209  |
| MCDP                         | -0.939 | 0.319  | 0.023  | -0.126 |
| Phospholipase A <sub>2</sub> | -0.944 | -0.275 | 0.159  | -0.092 |
| Melittin                     | -0.957 | -0.114 | -0.265 | 0.001  |
| Eigenvalue                   | 3.634  | 0.195  | 0.103  | 0.068  |
| Proportion                   | 0.908  | 0.049  | 0.026  | 0.017  |
| Cumulative                   | 0.908  | 0.957  | 0.983  | 1.000  |

**Table S5.** The correlation matrix for all analyzed constituents (apamine, MCDP, phospholipase A<sub>2</sub>, melittin) of bee venom (samples number 1 to 19).

|                              | Apamine | MCDP  | Phospholipase A <sub>2</sub> | Melittin |
|------------------------------|---------|-------|------------------------------|----------|
| Apamine                      | 1.000   | 0.911 | 0.892                        | 0.900    |
| MCDP                         | 0.911   | 1.000 | 0.814                        | 0.857    |
| Phospholipase A <sub>2</sub> | 0.892   | 0.814 | 1.000                        | 0.893    |
| Melittin                     | 0.900   | 0.857 | 0.893                        | 1.000    |
